# Supplementary material for: CRISPR/Cas9-mediated correction of MITF homozygous point mutation in a Waardenburg syndrome 2A pig model
Source: PubMed Central journal article supplement — Mol Ther Nucleic Acids. 2021 Apr 16;24:986–99. doi: 10.1016/j.omtn.2021.04.009 (PMC8141604; doi:10.1016/j.omtn.2021.04.009), 2021-04-16
Supplement: mmc1.pdf [file mmc1.pdf]

**Supplemental information**

**CRISPR/Cas9-mediated correction  
of *MITF* homozygous point mutation  
in a Waardenburg syndrome 2A pig model**

**Jing Yao, Yu Wang, Chunwei Cao, Ruigao Song, Dengfeng Bi, Hongyong Zhang, Yongshun Li, Guosong Qin, Naipeng Hou, Nan Zhang, Jin Zhang, Weiwei Guo, Shiming Yang, Yanfang Wang, and Jianguo Zhao**

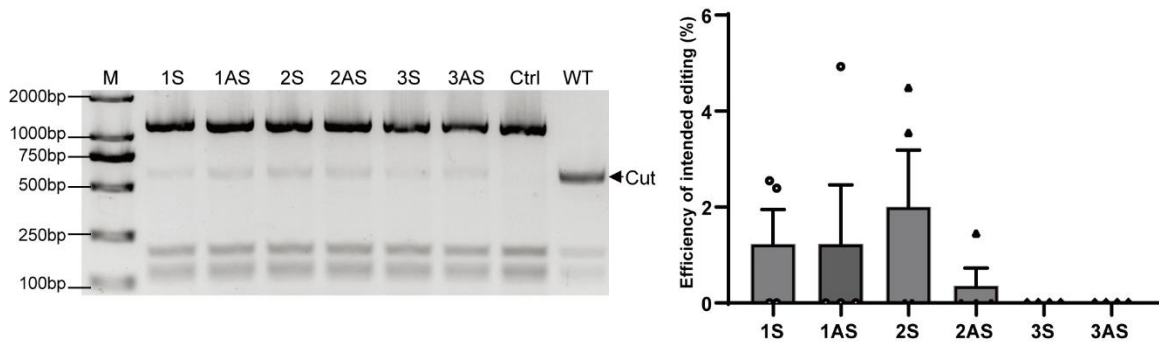

**Figure S1. The comparison of correction efficiency with different sgRNAs and ssODNs in *MITF*<sup>L247S/L247S</sup> fibroblast cells.** A representative genotyping picture of transfected cells by PCR and *Dral* digestion was shown on the left, and the quantitative efficiency of intended mutations evaluated by Hi-TOM was presented as Mean  $\pm$  SEM (n = 4 from four independent experiments) on the right. Sequences with the intended c.740 C>T correction and at least one introducing mutation in the donor DNA was counted as corrected events. 1~3 stands for sgRNA1~3 illustrated in Fig. 1B, S stands for the sense ssODN (ssODN-S), and AS stands for the antisense ssODN (ssODN-AS). Small deletions or insertions to the genomic TTTCAAAA sequence in *MITF* may result in TTTAAA sequence that could be cut by *Dral* but could not be counted as corrected events. Therefore, the estimated correction efficiency from the left genotyping picture may be higher than the actual correction efficiency.

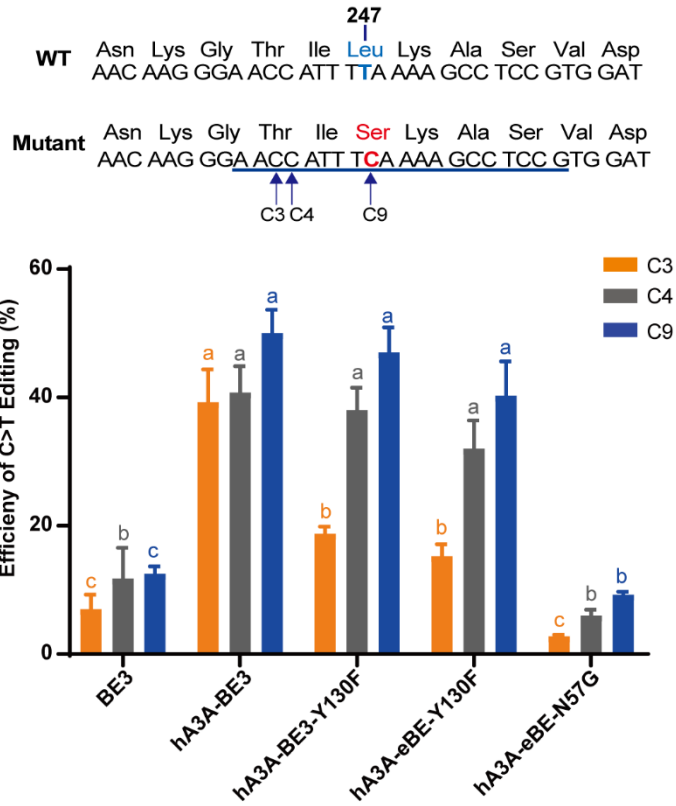

**Figure S2. The comparison of C>T editing efficiency with different base editors.** The targeted L247S (c.740 T>C) mutation was illustrated for BE editing. Efficiency of C>T editing was analyzed with EditR after Sanger sequencing of the PCR products from the transfected cells. The three Cs in the editing window was shown, counting the end distal to the PAM as position 1. Data are represented as the Mean  $\pm$  SEM (n = 4 from four independent experiments). a, b, c Values with no letter in common within the same C column (C3, C4 or C9) are significantly different, P<0.05.

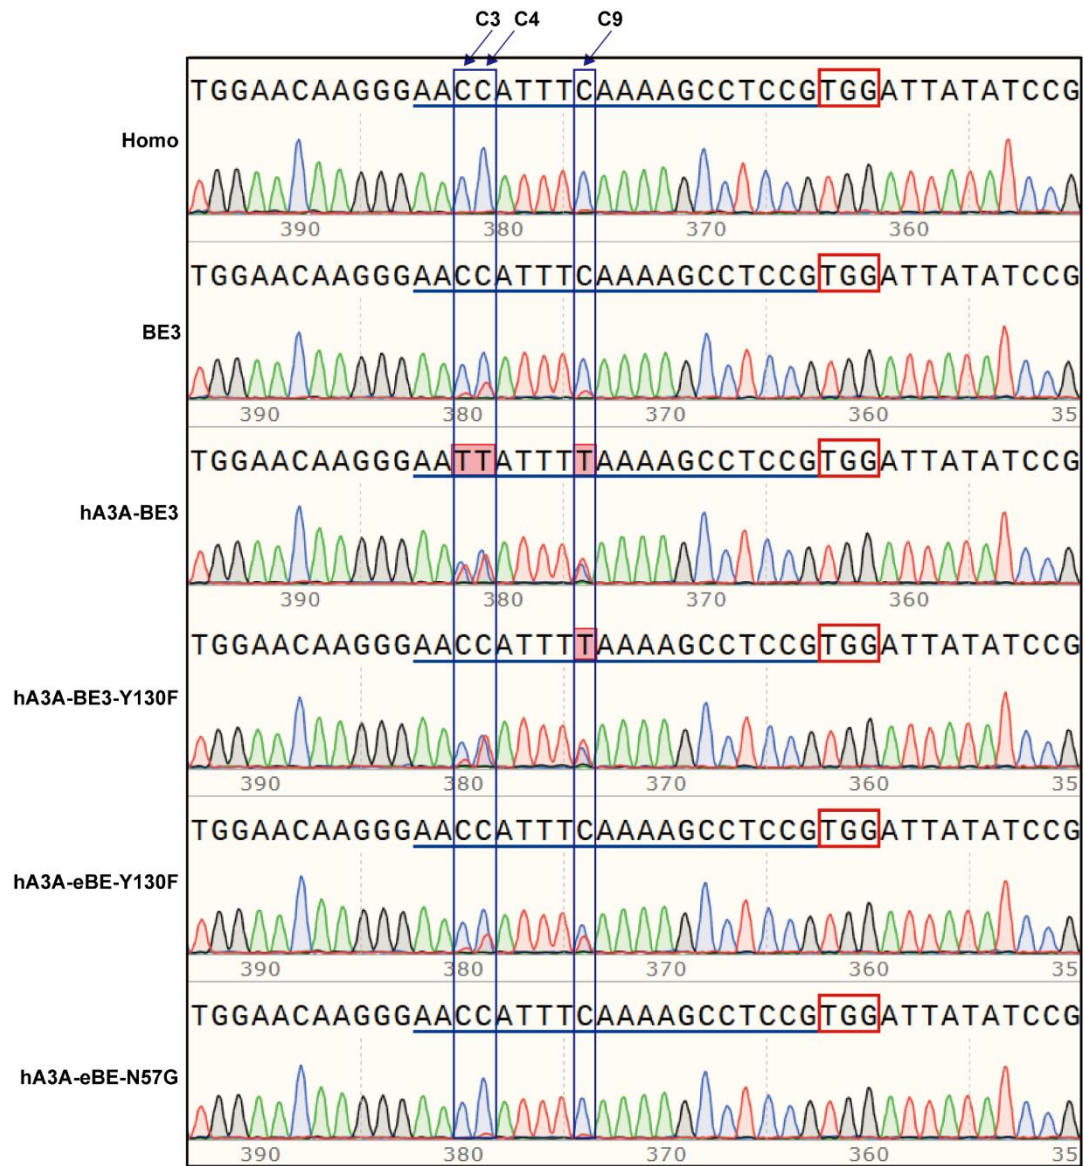

**Figure S3. The representative Sanger sequencing diagrams of the *MTF* amplicons in fibroblast cells transfected with different base editors.** The sgRNA sequences are underlined, the PAM sequences of the sgRNA are shown in red rectangle, and the edited Cs are indicated by rectangles and arrows. Homo stands for the *MTF*<sup>L247S/L247S</sup> fibroblast cells.

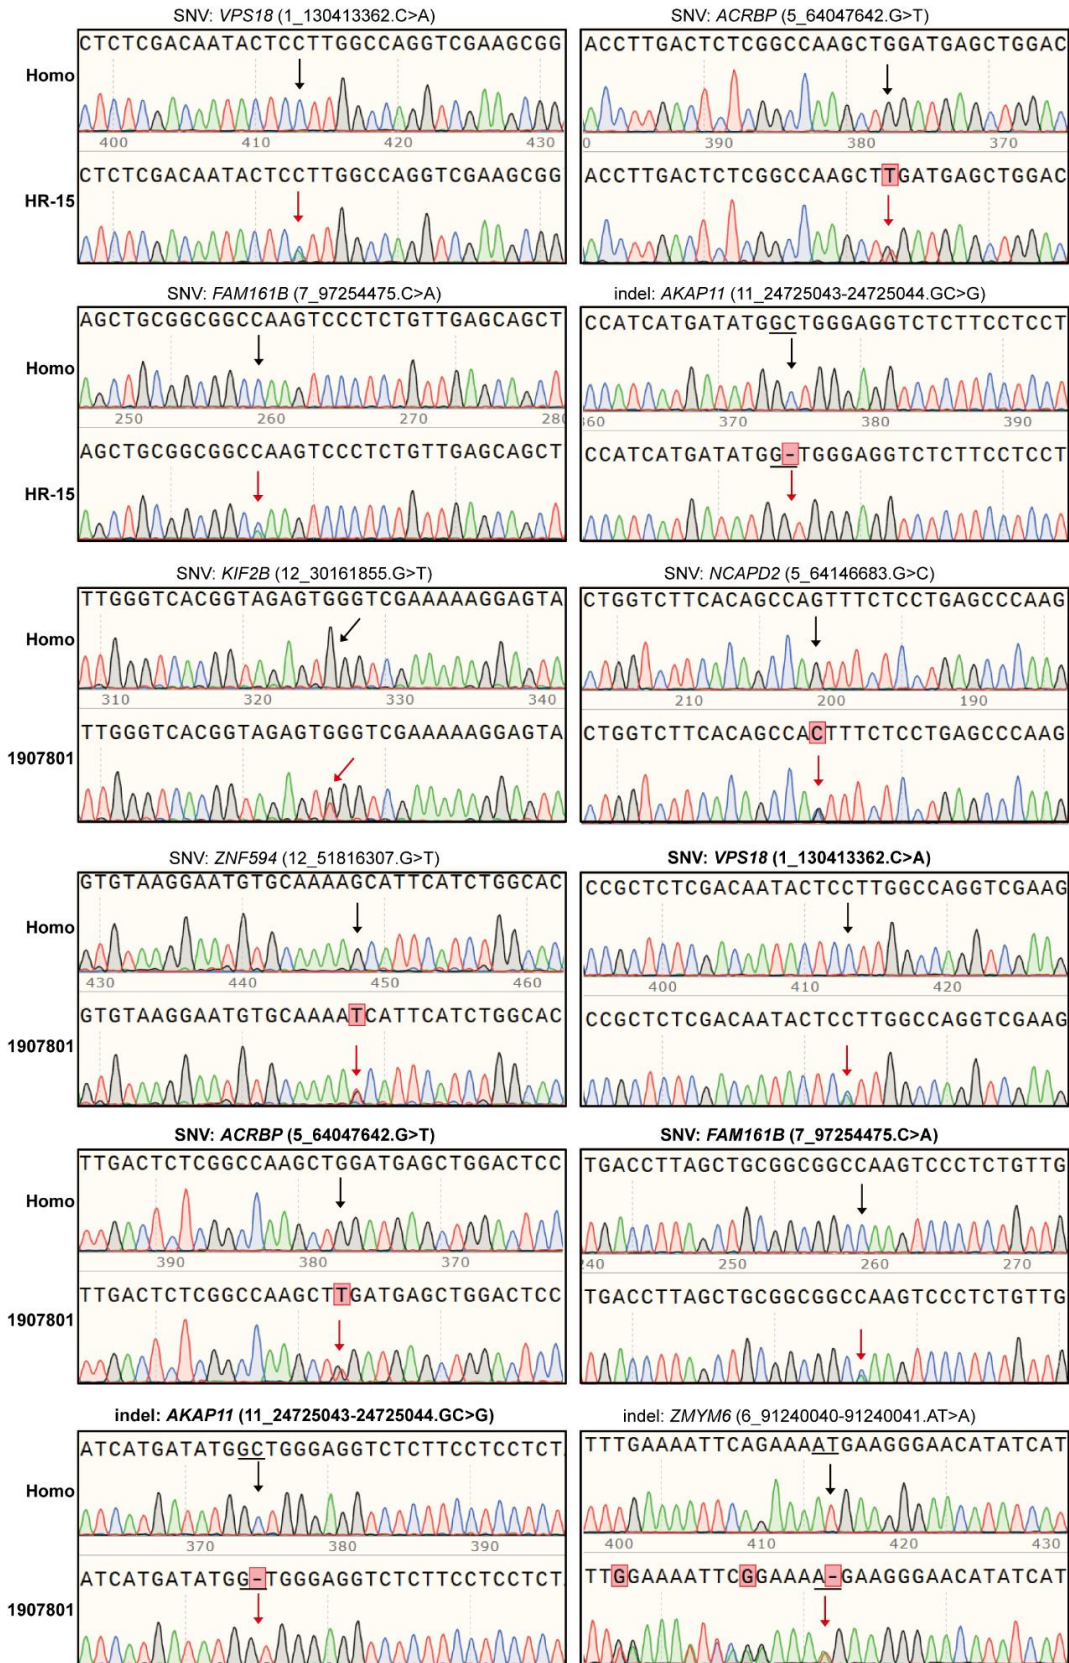

Figure S4. Representative Sanger sequencing diagrams of SNVs and indels detected by WGS in

colony HR-15 and HR-15 derived pig #1907801. The SNVs and indels detected simultaneously in HR-15 and 1907801 was shown in bold in sample 1907801. The detected mutations were indicated in red arrows, as compared with the original base(s), shown in black arrows.

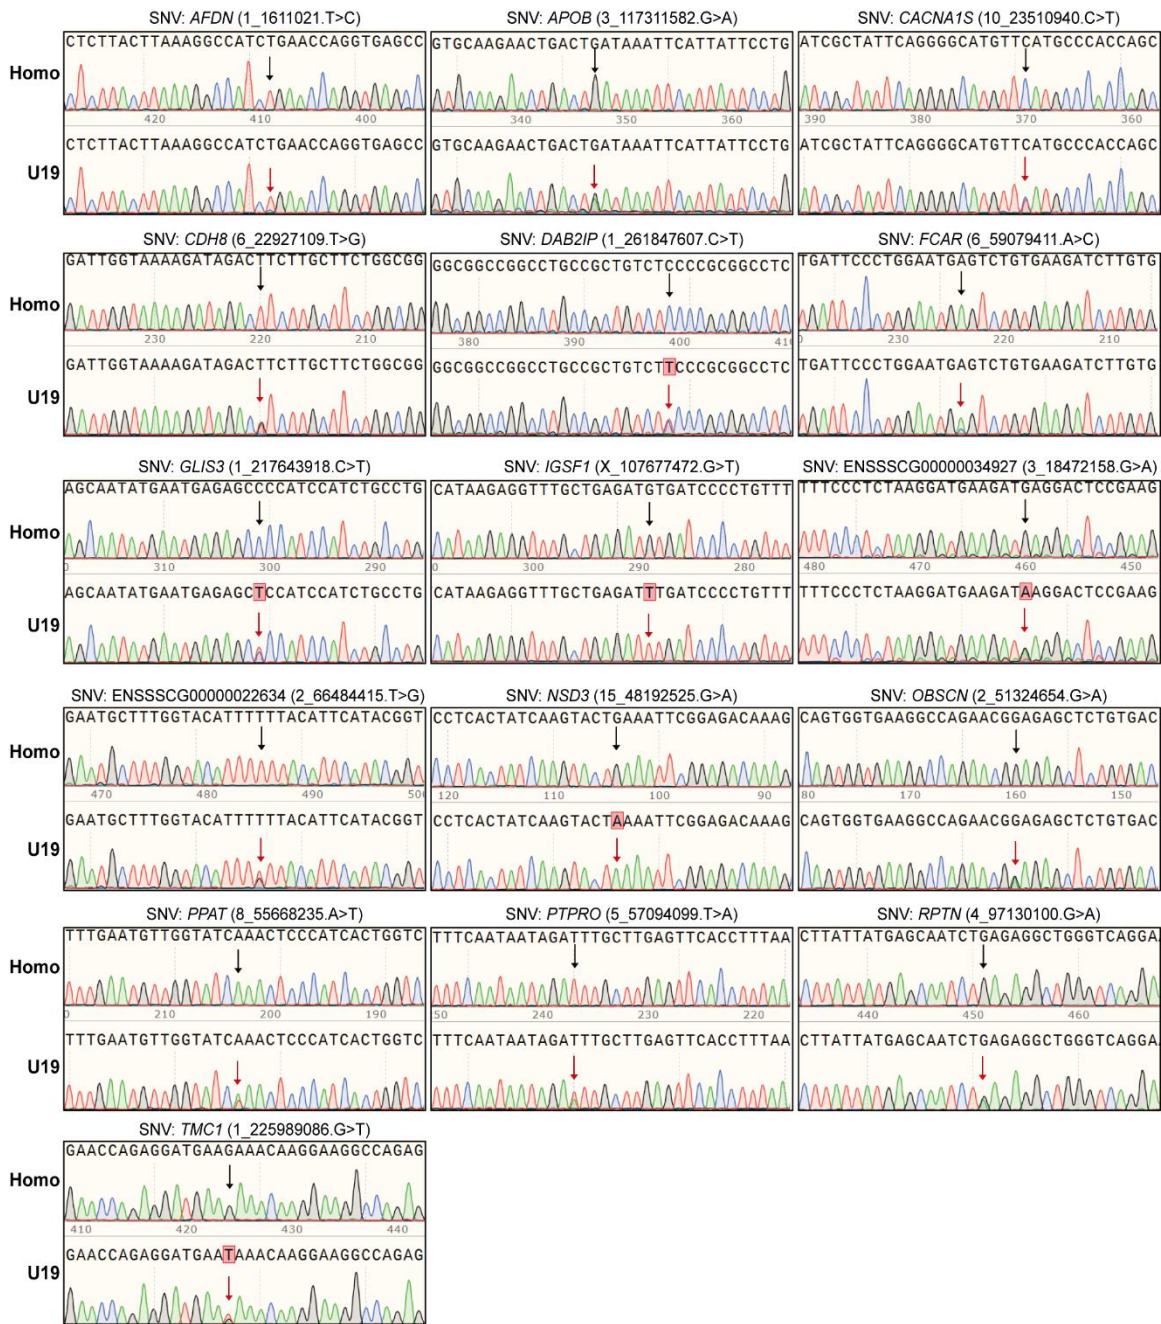

Figure S5. Representative Sanger sequencing diagrams of SNVs detected by WGS in colony U19. The detected mutations were indicated in red arrows, as compared with the original base(s), shown in black arrows.

**Table S1. Embryo transfer results of corrected pigs from ssODN-mediated strategy**

| Recipient ID | Donor cells | No. of embryos transferred | Pregnant and develop to term | No. of piglets       |
|--------------|-------------|----------------------------|------------------------------|----------------------|
| 1310701      | Colony 27   | 250                        | Y                            | 3 stillborn, 2 alive |
| 1303602      | Colony 27   | 250                        | Y                            | 3 alive              |
| 1319202      | Colony 27   | 231                        | Y                            | 4 alive              |
| 1222101      | Colony 27   | 300                        | N                            |                      |
| YJ160409     | Colony 27   | 287                        | N                            |                      |
| 1305105      | Colony 27   | 246                        | N                            |                      |
| 1234102      | Colony 27   | 276                        | N                            |                      |
| 1313605      | Colony 27   | 250                        | N                            |                      |
| 1234302      | Colony 27   | 290                        | N                            |                      |

**Table S2. Embryo transfer results of corrected pigs from long donor DNA-mediated strategy**

| Recipient ID | Donor cell   | No. of embryos transferred | Pregnant and develop to term | No. of piglets       |
|--------------|--------------|----------------------------|------------------------------|----------------------|
| 1803502      | HR-15 colony | 270                        | Y                            | 2 stillborn, 4 alive |
| WT180202     | HR-15 colony | 275                        | Y                            | 1 stillborn          |
| 1807701      | HR-15 colony | 280                        | N                            |                      |
| 1807401      | HR-15 colony | 245                        | N                            |                      |
| WT177504     | HR-15 colony | 300                        | Y                            | 2 alive              |
| 1807002      | HR-15 colony | 275                        | N                            |                      |

**Table S3. Embryo development derived from *MITF*<sup>L247S/L247S</sup> and *MITF*<sup>L247S/+</sup> fibroblast cells after microinjection**

| Donor cell                                  | No. of reconstructed embryos | Cleavage rate (%) | Blastocyst rate (%) |
|---------------------------------------------|------------------------------|-------------------|---------------------|
| Hetero ( <i>MITF</i> <sup>L247S/+</sup> )   | 374                          | 79.41 (297/374)   | 13.37 (50/374)      |
| Homo ( <i>MITF</i> <sup>L247S/L247S</sup> ) | 379                          | 78.36 (297/379)   | 18.21 (69/379)      |

**Table S4. Overview of WGS reads**

| Sample  | Raw reads   | Clean reads | Raw Base (G) | Clean Base (G) | Error rate (%) | Coverage (>Q30) |
|---------|-------------|-------------|--------------|----------------|----------------|-----------------|
| Homo    | 789,114,709 | 787,919,487 | 236.73       | 236.38         | 0.03           | 92.53%          |
| HR-15   | 790,559,880 | 789,735,106 | 237.17       | 236.92         | 0.03           | 92.42%          |
| 1907801 | 747,263,061 | 746,510,388 | 224.18       | 223.95         | 0.03           | 92.24%          |
| U19     | 771,922,698 | 769,838,126 | 231.58       | 230.95         | 0.03           | 91.97%          |

**Table S5. Sanger sequencing primers for validation of WGS results**

See the file Table S5.xlsx

**Table S6. Sanger sequencing validation of WGS results**

See the file Table S6.xlsx



**Table S7. Primers used in the study**

| <b>Oligos for constructing long donor DNA plasmids</b> |                                                                      |                |
|--------------------------------------------------------|----------------------------------------------------------------------|----------------|
| <b>Primer name</b>                                     | <b>Sequence (5'-3')</b>                                              | <b>Product</b> |
| HA-sgRNA3-F                                            | CTTTCGGATATAATCCACGGAGGCCCTACCATTTCCTAGCAGT                          | 1684 bp        |
| HA-sgRNA4-R                                            | TTTTTAGGACGCGAAGATCCAGGGCTGATCCAAACACTGAATT                          |                |
| HA-sgRNA1-F                                            | ATCCACGGAGGCTTTTGAATGGCCCTACCATTTCCTAGCAGT                           | 1684 bp        |
| HA-sgRNA1-R                                            | ATCCACGGAGGCTTTTGAATGGGCTGATCCAAACACTGAATT                           |                |
| HA-F2                                                  | CCCTACCATTTCCTAGCAGT                                                 | 1638 bp        |
| HA-R2                                                  | GCTGATCCAAACACTGAATT                                                 |                |
| sgRNA3-mu-F                                            | AGCGTCCGTGGATTATATCCGAAAGTTGC                                        |                |
| sgRNA3-mu-R                                            | TTTAAAATGGTTCCTTGTTCAGCGCATG                                         |                |
| sgRNA4-mu-F                                            | TCGTGGATCTTCGCGTCTAAAAAAAAGTC                                        |                |
| sgRNA4-mu-R                                            | ATATGGAGCATTCAATAGTCAGAGCATTTCG                                      |                |
| sgRNA1-mu-F                                            | AACGATTTTAAAAGCCTCCGTGGATTATATC                                      |                |
| sgRNA1-mu-R                                            | CCCTTGTTCCAGCGCATGTCTCTGTGATG                                        |                |
| <b>Oligos for genotyping</b>                           |                                                                      |                |
| <b>Primer name</b>                                     | <b>Sequence (5'-3')</b>                                              | <b>Product</b> |
| M-HA-F1                                                | GAGTGGTTTAGGGCATGAAG                                                 | 1749 bp        |
| M-HA-R1                                                | CCACCCAGTCTATGGTATTTT                                                |                |
| MITF(8-g)-F                                            | AGTATGAGCCTTGTCACACCTTA                                              | 546 bp         |
| MITF(8-g)-R                                            | GCTGTAGTCTTTGCCATCTTTAG                                              |                |
| MITF-M-2F                                              | CACAACCTTGATTGAACGAAG                                                | 197bp          |
| MITF-M-2R                                              | AGCTTCTTCTGTCTGTTTTCA                                                |                |
| MITF-M-1F                                              | AGCCCAAAGGCAGCAGGTAA                                                 | 988 bp         |
| MITF-M-1R                                              | TCCGAGGTTGTTGTTGAAGGTG                                               |                |
| MITF-new-F                                             | CCCACCAAGTACCACATACAGC                                               | 1565bp         |
| MITF-new-R                                             | AAGGAAGTCACAGGCATACAAAT                                              |                |
| MITF-Target-F1                                         | ggagtgagtacggtgtgcTGGGCTGTAGTCTTTGCCAT                               | 242bp          |
| MITF-Target-R1                                         | gagttggatgctggatggTCAAGCTCTTTTGC GCGTTG                              |                |
| <b>Oligos for <i>in vitro</i> transcription</b>        |                                                                      |                |
| <b>Primer name</b>                                     | <b>Sequence (5'-3')</b>                                              |                |
| sgRNA2-IVT-F                                           | TAATACGACTCACTATAGGA <u>ACCATTTC</u> AAAAGCCTCCGTTT <u>TAGAGCTAG</u> |                |
|                                                        | AAATAGC                                                              |                |
| sgRNA2-IVT-R                                           | TAATGCCAACTTTGTACAAGAAAG                                             |                |
